# Supplementary material
Source: Frontiers journal article supplement (https://www.frontiersin.org/articles/376839)
Supplement: Presentation_2.PDF [file Presentation_2.PDF]

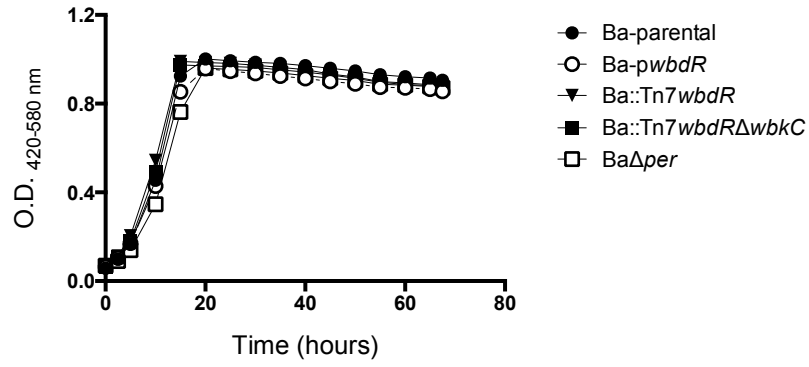

**Figure S2. The *wbdR* constructs do not show growth defects *in vitro*.** Ba-parental, Ba-pwbdR, Ba::Tn7wbdR, Ba::Tn7wbdRΔwbkC and the rough mutant BaΔper as a control were grown in TSB. Each point represents the mean of triplicates samples (error bars are within the size of the symbols). Data are representative of three independent experiments.
